# Supplementary material
Source: PubMed Central journal article supplement (PMC10816483)
Supplement: Troubleshooting_bradycardia.pdf [file Troubleshooting_bradycardia.pdf]

## Troubleshooting bradycardia

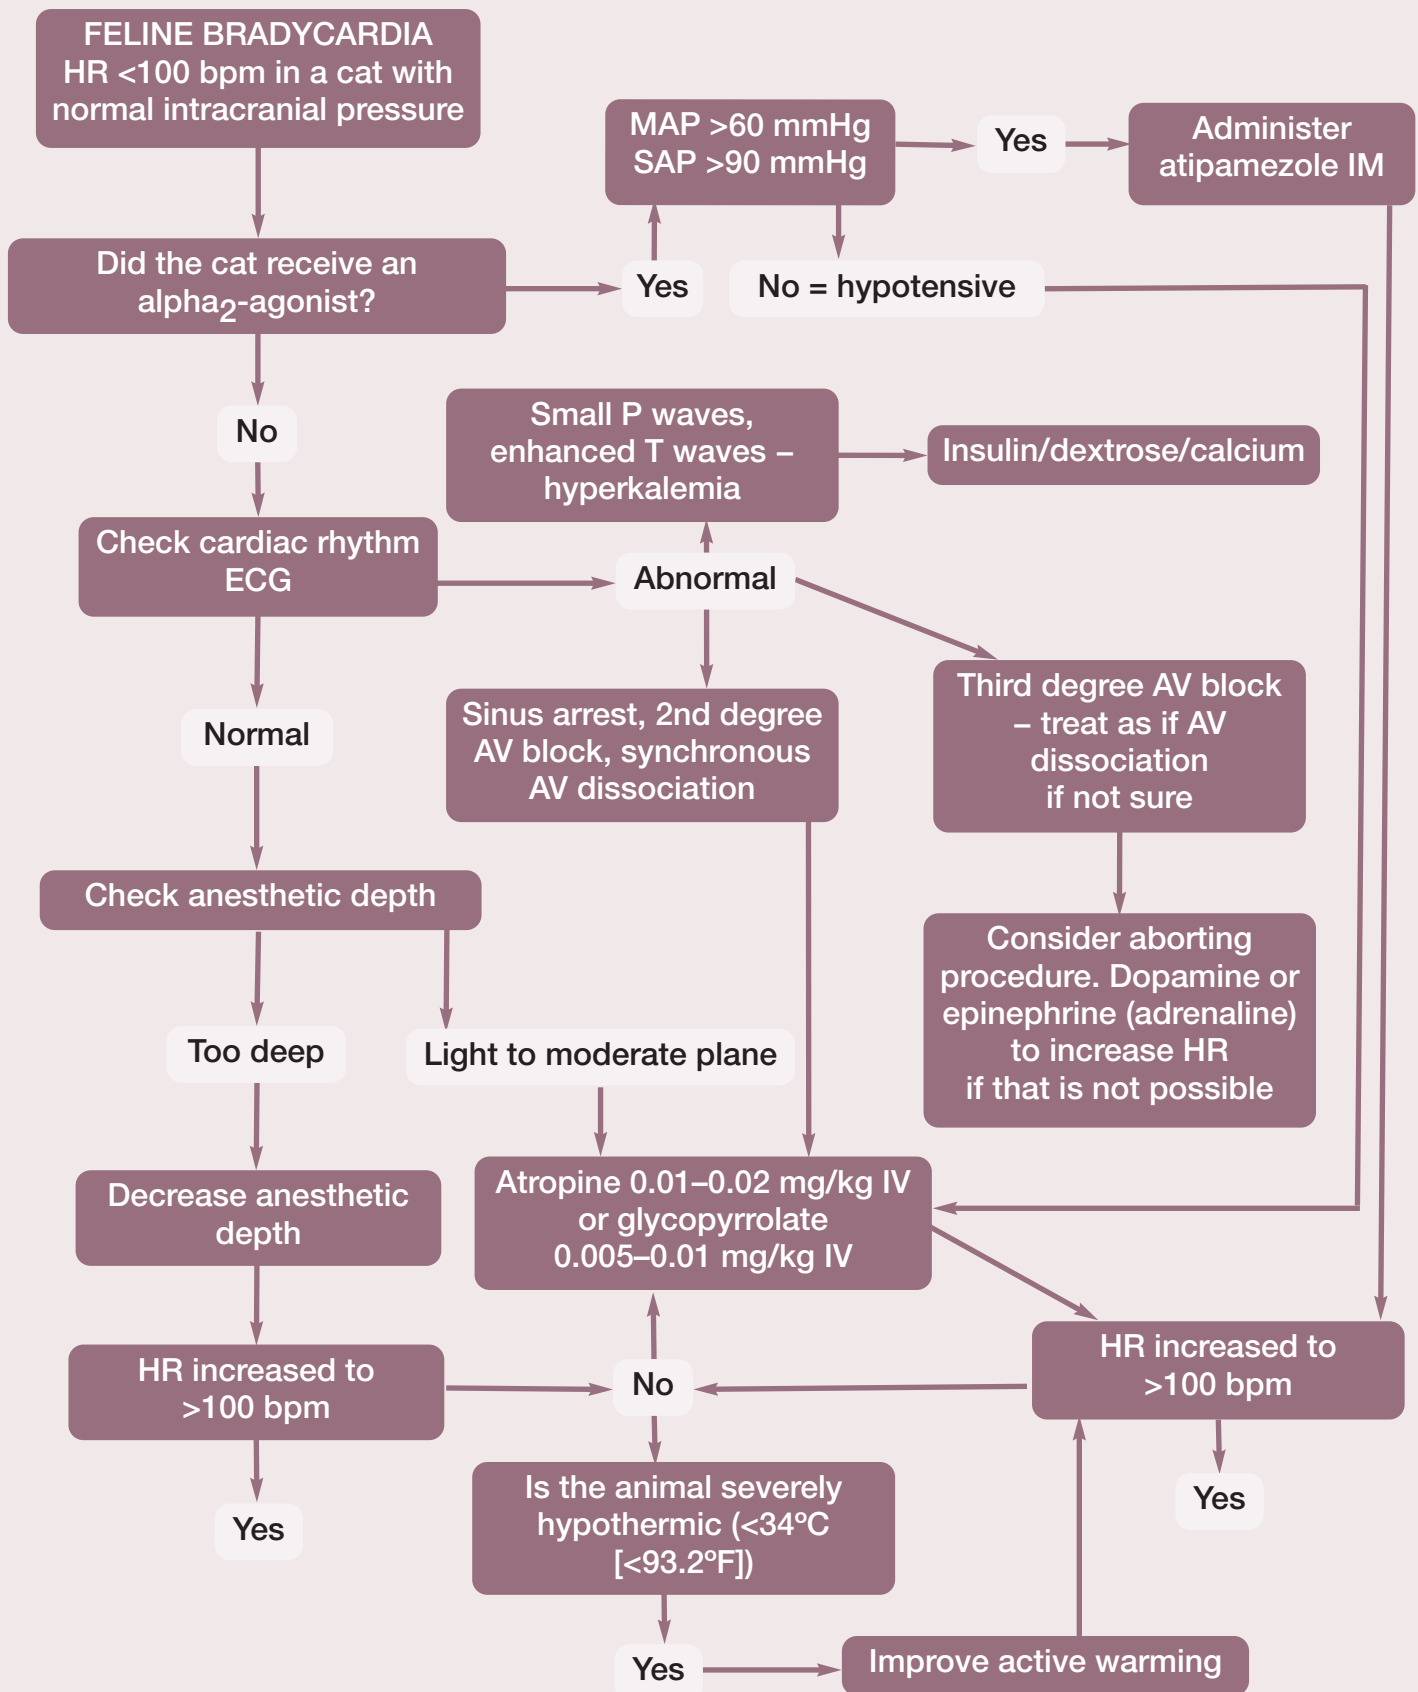

This algorithm is from the AAEP Feline Anesthesia Guidelines, published in *JFMS* in July 2018 and available at [catvets.com/guidelines](http://catvets.com/guidelines)

**Key** AV = atrioventricular; ECG = electrocardiography; HR = heart rate; IM = intramuscular; IV = intravenous; MAP = mean arterial pressure; SAP = systolic arterial pressure
