# Supplementary material
Source: PubMed Central journal article supplement (PMC10816483)
Supplement: Troubleshooting_hypotension.pdf [file Troubleshooting_hypotension.pdf]

## Troubleshooting hypotension

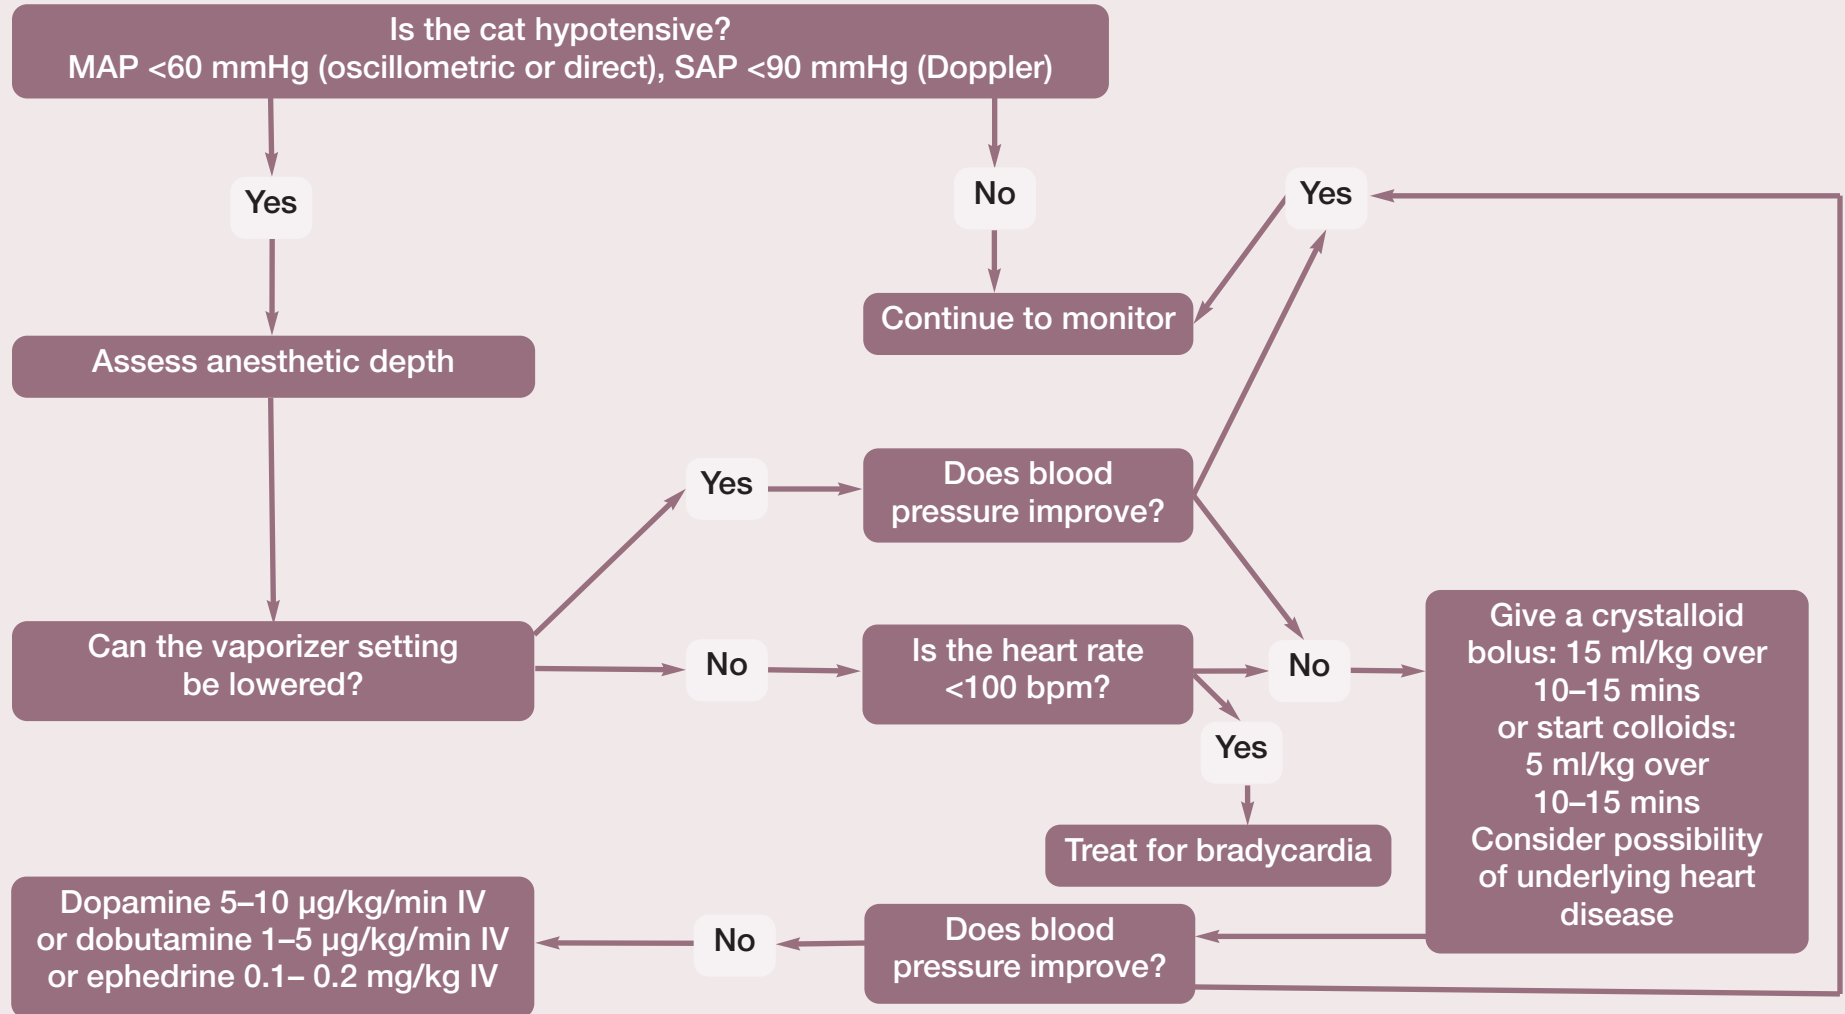

This algorithm is from the AAFP Feline Anesthesia Guidelines, published in *JFMS* in July 2018 and available at [catvets.com/guidelines](http://catvets.com/guidelines)

**Key** IV = intravenous; MAP = mean arterial pressure; SAP = systolic arterial pressure
