# Supplementary material
Source: PubMed Central journal article supplement (PMC10816483)
Supplement: Troubleshooting_hypoxemia.pdf [file Troubleshooting_hypoxemia.pdf]

# Troubleshooting hypoxemia

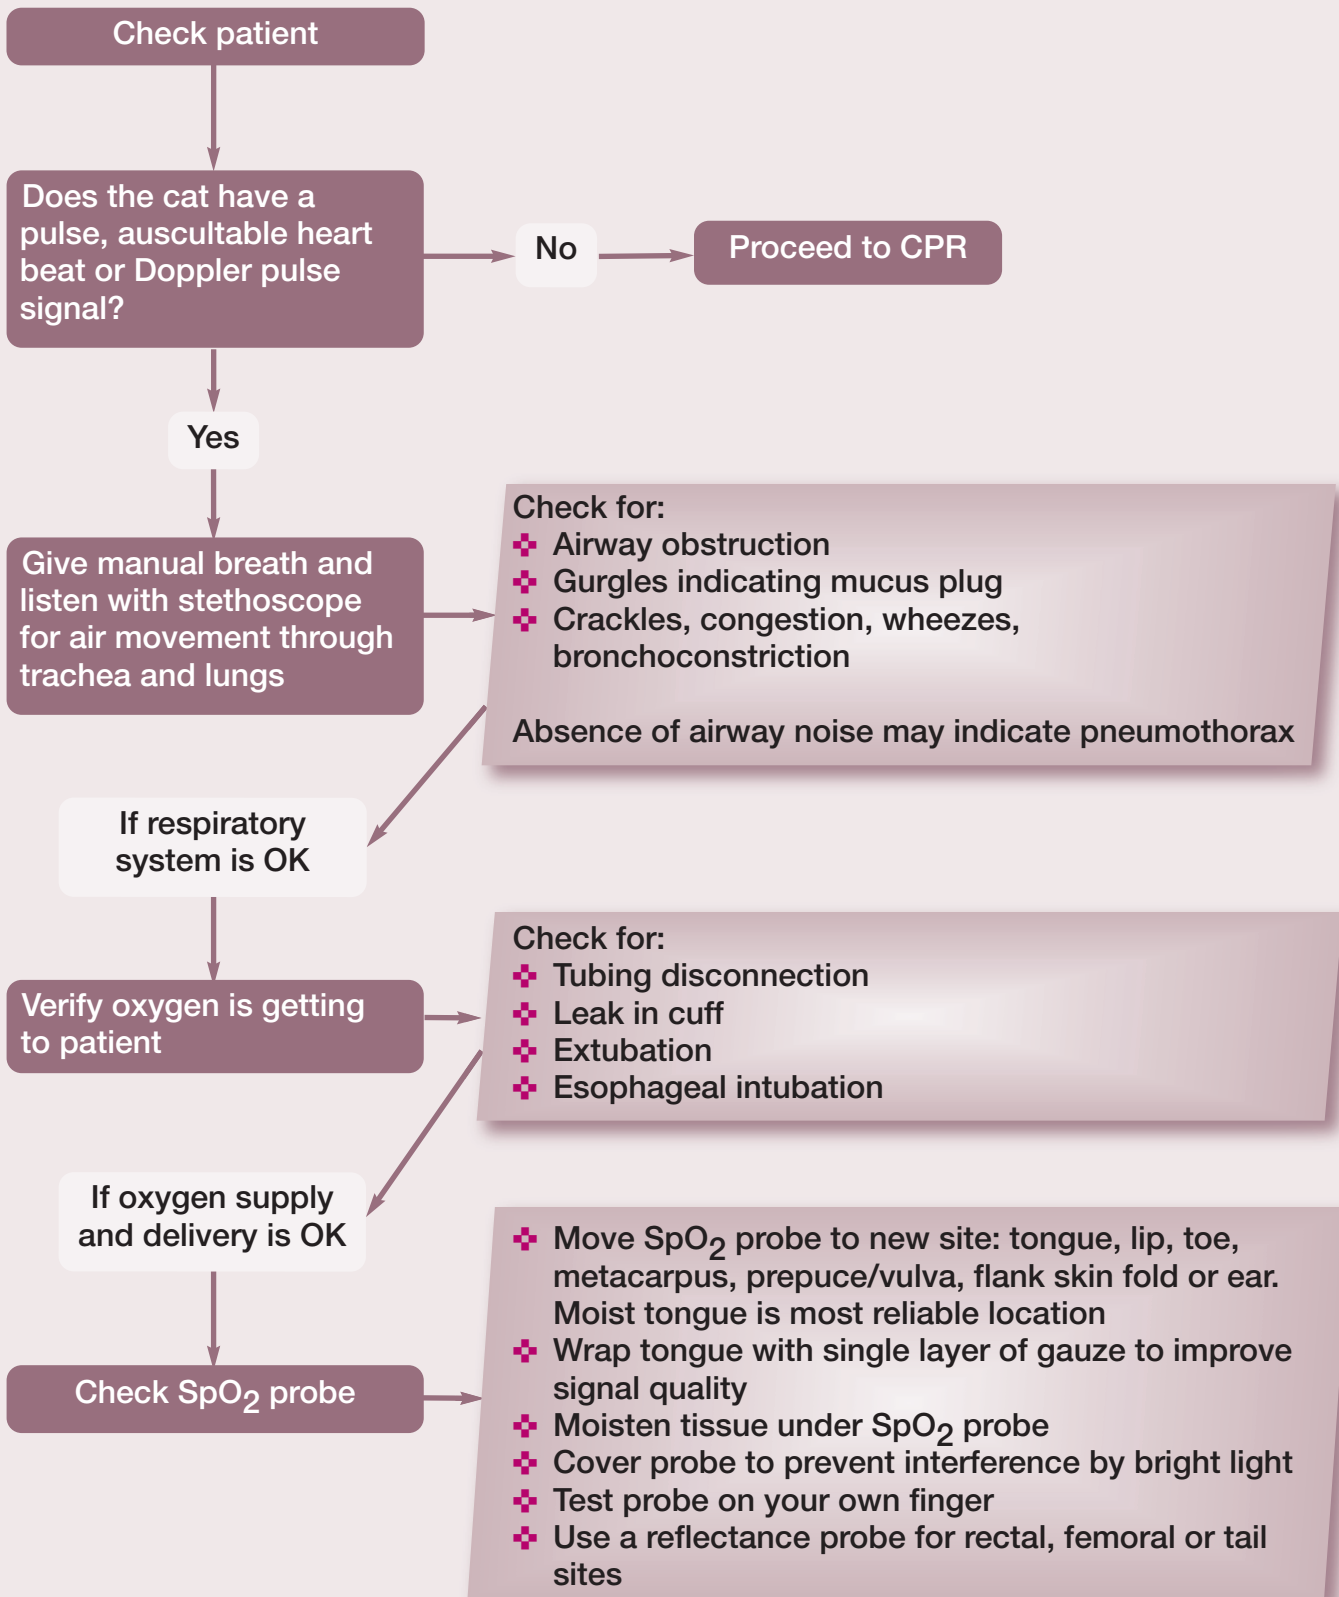

This algorithm is from the AAFP Feline Anesthesia Guidelines, published in *JFMS* in July 2018 and available at [catvets.com/guidelines](http://catvets.com/guidelines)

**Key** CPR = cardiopulmonary resuscitation; SpO<sub>2</sub> = oxygen saturation of hemoglobin
