# Supplementary material
Source: PubMed Central journal article supplement (PMC10816483)
Supplement: Troubleshooting_prolonged_recovery.pdf [file Troubleshooting_prolonged_recovery.pdf]

# Troubleshooting prolonged recovery

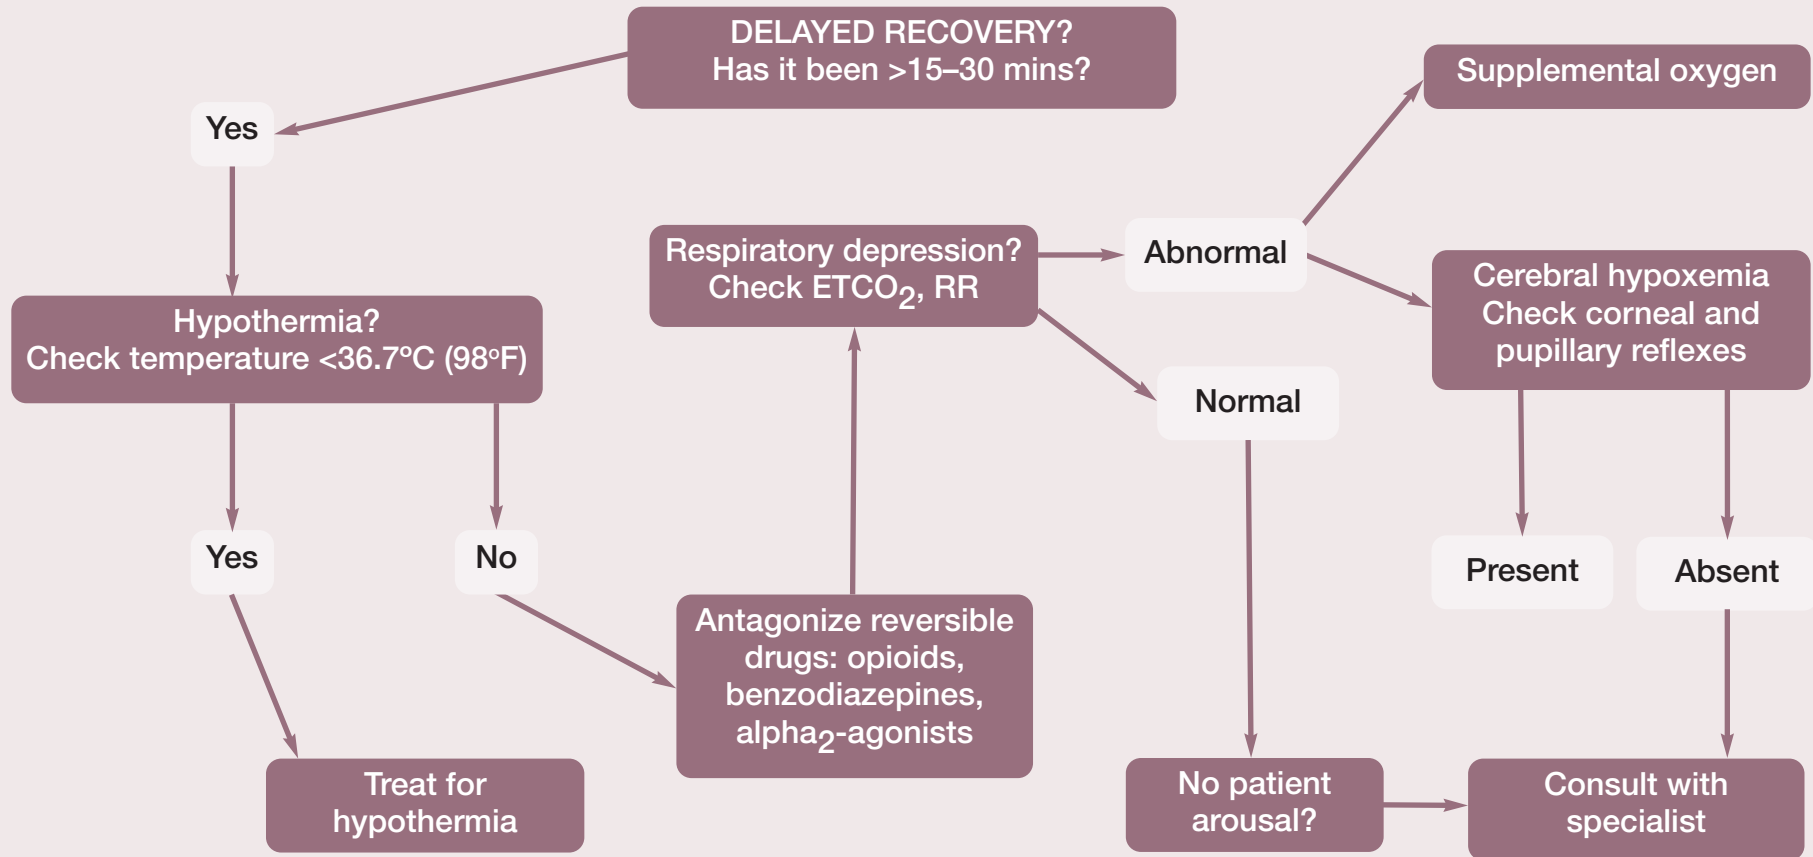

This algorithm is from the AAFP Feline Anesthesia Guidelines, published in *JFMS* in July 2018 and available at [catvets.com/guidelines](http://catvets.com/guidelines)

**Key** ETCO<sub>2</sub> = end-tidal carbon dioxide; RR = respiratory rate
