# Supplementary material
Source: PubMed Central journal article supplement (PMC10816483)
Supplement: Troubleshooting_tachycardia.pdf [file Troubleshooting_tachycardia.pdf]

## Troubleshooting tachycardia

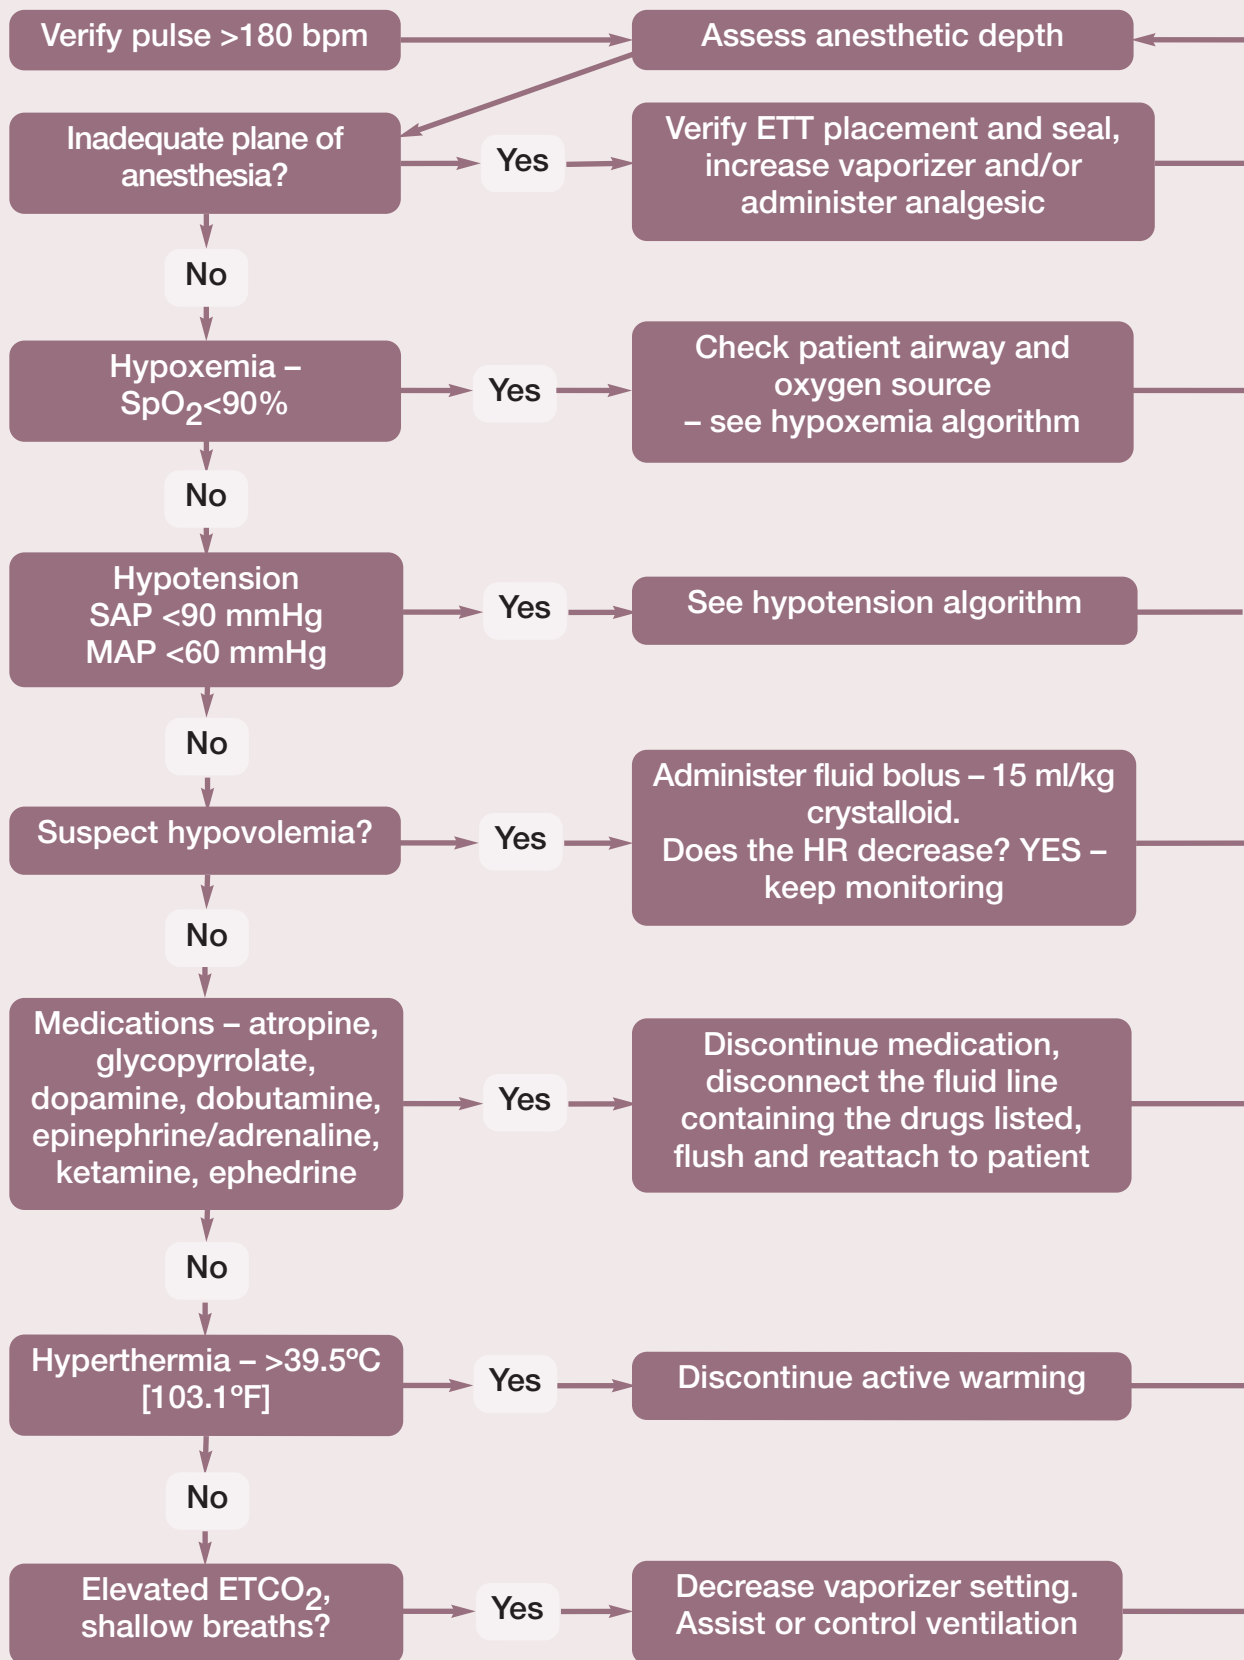

This algorithm is from the AAFP Feline Anesthesia Guidelines, published in *JFMS* in July 2018 and available at [catvets.com/guidelines](http://catvets.com/guidelines)

**Key** ETCO<sub>2</sub> = end-tidal carbon dioxide; ETT = endotracheal tube; MAP = mean arterial pressure; SAP = systolic arterial pressure; SpO<sub>2</sub> = oxygen saturation of hemoglobin in arterial blood
