# Supplementary material
Source: PubMed Central journal article supplement (PMC10816483)
Supplement: Troubleshooting_ventilation.pdf [file Troubleshooting_ventilation.pdf]

# Troubleshooting ventilation

Act if:  $\text{ETCO}_2 < 20 \text{ mmHg}$ ,  $\text{ETCO}_2 > 60 \text{ mmHg}$  or inspired  $\text{CO}_2 > 5 \text{ mmHg}$

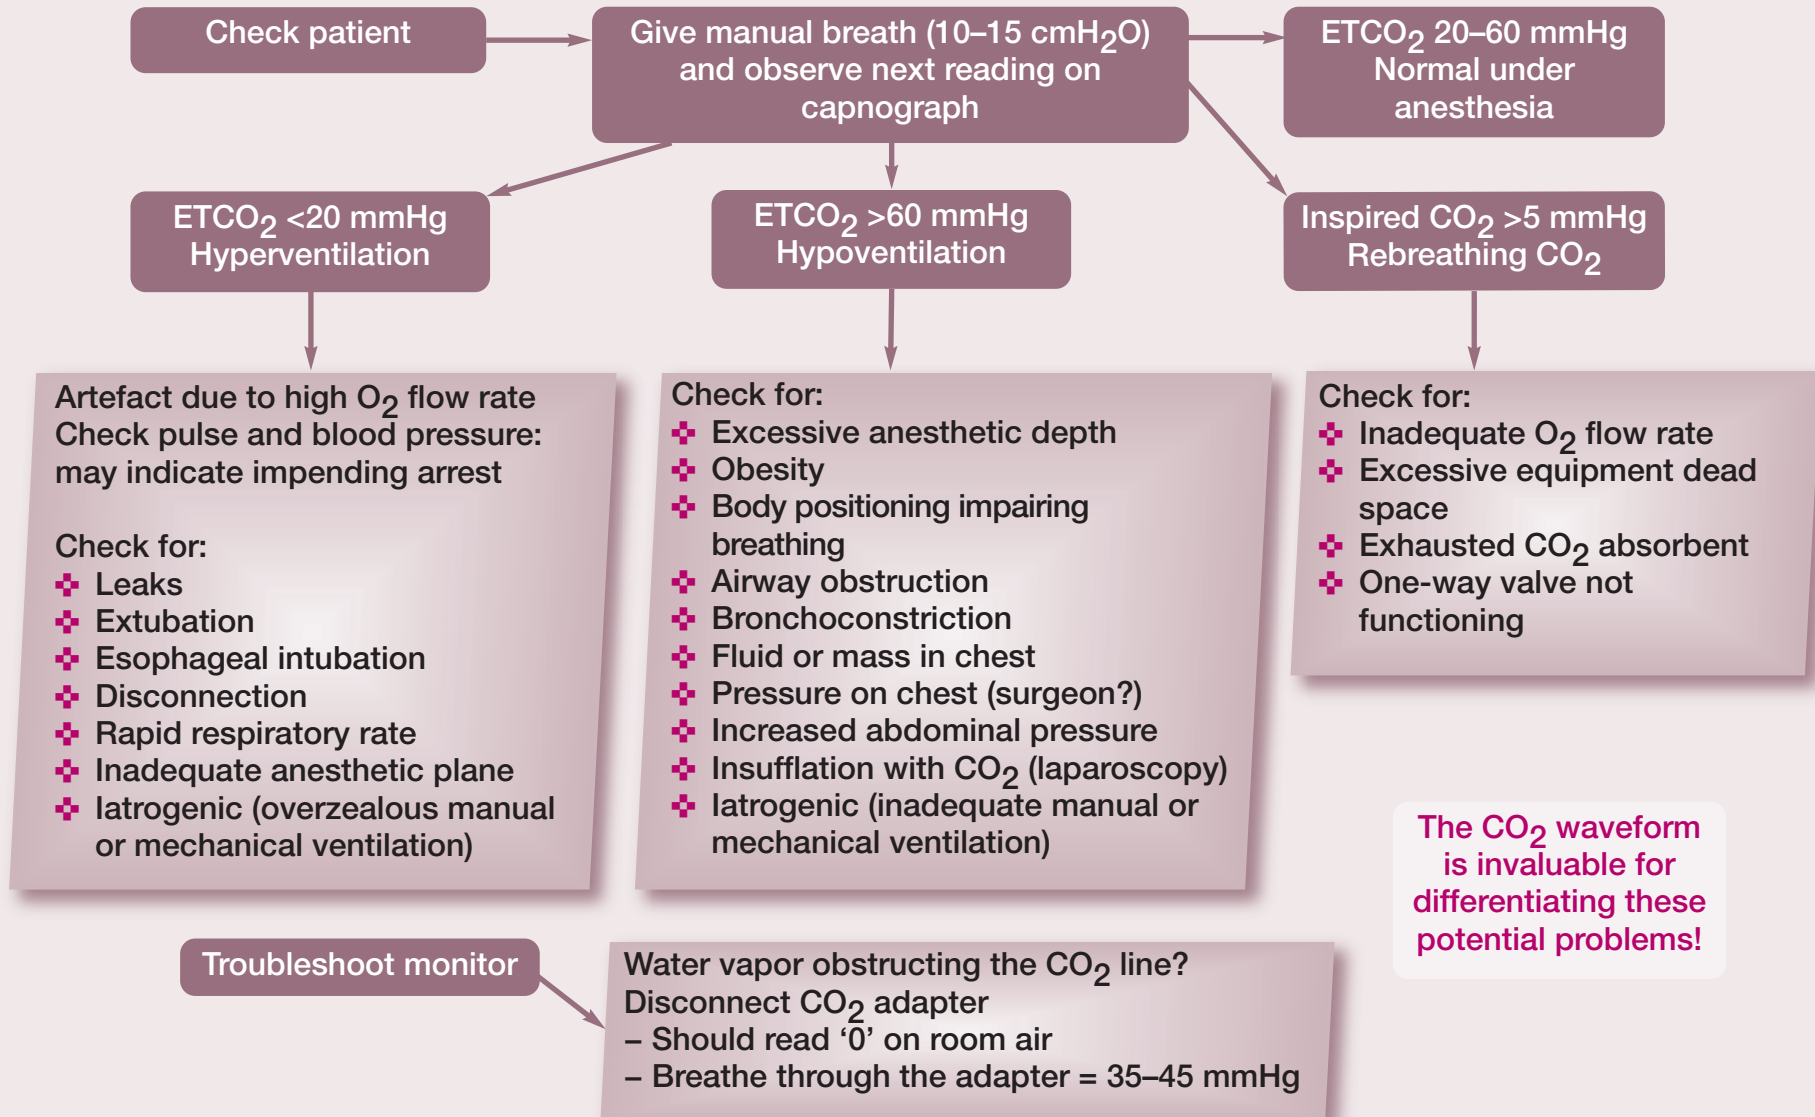

This algorithm is from the AAFP Feline Anesthesia Guidelines, published in *JFMS* in July 2018 and available at [catvets.com/guidelines](http://catvets.com/guidelines)

**Key** ETCO<sub>2</sub> = end-tidal carbon dioxide
